Overt social interaction and resting state in autism: core and contextual neural features

Kyle Jasmin<sup>1,2</sup>, Stephen J. Gotts<sup>1</sup>, Y. Xu, S. Liu<sup>3</sup>, Cameron Riddell<sup>1</sup>, John Ingeholm<sup>1</sup>, Lauren Kenworthy<sup>4</sup>, Gregory L. Wallace<sup>1,5</sup>, Allen R. Braun<sup>6</sup>, Alex Martin<sup>1</sup>

1. Section on Cognitive Neuropsychology, Laboratory of Brain and Cognition, NIMH, NIH.
2. Department of Psychological Sciences, Birkbeck University of London.
3. Developmental Neurogenomics Unit, Human Genetics Branch, NIMH, NIH.
4. Children's National Medical Center, Washington D.C.
5. Department of Speech, Language, and Hearing Sciences, George Washington University, Washington, D.C.
6. Walter Reed Army Institute of Research, Bethesda, M.D.

Correspondence to:

Kyle Jasmin  
Department of Psychological Sciences  
Birkbeck University of London  
Malet Street  
London WC1E 7HX  
United Kingdom  
k.jasmin@bbk.ac.uk

## **Abstract**

Conversation is an important and ubiquitous social behavior. Individuals with Autism Spectrum Disorder (autism) without intellectual disability often have normal language abilities but deficits in social aspects of verbal interaction like pragmatics, prosody, and eye contact. Previous studies of resting state activity suggest that intrinsic connections among neural circuits involved with social processing are disrupted in autism, but to date no neuroimaging study has examined neural activity during the most commonplace yet challenging social task: spontaneous conversation. Here we used functional MRI to scan autistic males (N=19) without intellectual disability and age- and IQ-matched typically developing controls (N=20) while they engaged in a total of 193 face-to-face interactions. Participants completed two kinds of tasks: Conversation, which had high social demand, and Repetition, which had low social demand. Autistic individuals showed abnormally increased task-driven inter-regional temporal correlation relative to controls, especially among social processing regions and during high social demand. Furthermore, these increased correlations were associated with more severe autism symptoms. These results were then compared with previously-acquired resting-state data (56 Autism, 62 Control participants). While some inter-regional correlation levels varied by task or rest context, others were strikingly similar across both task and rest, namely increased correlation among the thalamus, dorsal and ventral striatum, somatomotor, temporal and prefrontal cortex in the autistic individuals, relative to the control groups. These results suggest a basic distinction. Autistic cortico-cortical interactions vary by context, tending to increase relative to controls during Task and decrease during Rest. In contrast, striato- and thalamocortical relationships with socially engaged brain regions are increased in both Task and Rest, and may be core to the condition of autism.

## **Keywords**

Autism, conversation, fMRI, language, resting-state

## **Abbreviations**

BOLD: Blood Oxygen Level Dependent

IFG: inferior frontal gyrus

IQ: Intelligence Quotient

PCA: principal component analysis

ROI: region of interest

SD: standard deviation

STS: superior temporal sulcus

TR: Repetition Time

## Introduction

Conversation is an important part of everyday life that provides a means to share information and express affiliation. Abnormal brain development during childhood causes some people to struggle with conversation, as in the case of Autism Spectrum Disorder (referred to hereafter as "autism"). This class of neurodevelopmental conditions is characterized by deficits in social functioning, communication, repetitive behaviors, and stereotyped interests (Lord *et al.*, 2000). Structural language *per se* may be unimpaired except where it intersects with social processing (Mundy *et al.*, 1990) such as in pragmatics (Baron-Cohen, 1988; Loukusa and Moilanen, 2009), and prosody (Paul *et al.*, 2005; Shriberg *et al.*, 2001). Non-verbal aspect of communication such as eye gaze (C. D. Frith and U. Frith, 1999; Loveland and Landry, 1986; Pelphrey *et al.*, 2005) and hand gestures (Attwood *et al.*, 1988; de Marchena and Eigsti, 2010) are also often impaired, and elicitation of deficits in these behaviors through tools like the ADOS (Autism Diagnostic Observation Schedule, (Lord *et al.*, 2000) is standard diagnostic procedure. Indeed, one of the DSM-5 (Diagnostic and Statistical Manual of Mental Disorders) Social-Communication symptoms of autism is problems with social-emotional reciprocity as seen in normal conversational turn-taking. Severe impairments in social interaction have been linked with difficulty establishing and maintaining social relationships (Orsmond *et al.*, 2004), thus abnormal conversation behavior can have serious consequences for people with autism.

Despite conversation's ubiquity and social importance, no published neuroimaging studies have measured neural activity in autistic individuals while they are engaged in face-to-face conversation with naturalistic sensory, cognitive, communicative and social demands. Instead, studies have focused on the components of conversation with which people with autism struggle. Investigations of vocal prosody have found abnormally increased brain activity both within the same network of regions active in typically developing control participants (Wang *et*

*al.*, 2006) and across diffuse regions outside of typical networks (Colich *et al.*, 2012; Eigsti *et al.*, 2012). Studies of pragmatic processing have found that integrating linguistic and real-world knowledge is associated with abnormally low levels of activity in left IFG in autistic children (Groen *et al.*, 2010) but abnormally high levels in homologous right IFG in autistic adults (Tesink *et al.*, 2009).

Meanwhile, resting-state studies evaluating intrinsic brain organization have indicated that disordered connections between cortical regions may play a role. Functional MRI and magnetoencephalography studies with adolescents and young adults have shown that neural activity among cortical areas involved with social processing is less correlated in autism (Abrams *et al.*, 2013; Ghuman *et al.*, 2017; e.g. Gotts *et al.*, 2012; Hagen *et al.*, 2013; Just *et al.*, 2004), while activity between the thalamus, striatum and some of the same social brain regions in cortex is more correlated (e.g. Di Martino, Ross, *et al.*, 2009; Müller, 2014; see Picci *et al.*, 2016 for review). Other studies have highlighted additional and complex aspects of the resting-state functional connectivity changes (Hahamy *et al.*, 2015). Nevertheless, the most common findings from resting-state studies of autism, particularly for adolescents and adults, are decreases among cortical regions associated with social processing, such as the STS, IFG, medial frontal cortex, and somatosensory cortex, many of which are also associated with aspects of speech and language processing and production (Jasmin *et al.*, 2016; Scott *et al.*, 2000; e.g. Turken and Dronkers, 2011).

Here we investigate the neural basis of face-to-face verbal interactions in matched samples of young males with and without an autism diagnosis. Participants were scanned with functional MRI while they spoke via cameras and microphones with a real interaction partner. The interactions took place under two conditions: *Conversation* – wherein the participant spoke

spontaneously and reciprocally with their partner, and *Repetition* – in which the subject merely repeated their partner's speech. These two tasks had similar sensory and motor components (both involving turn-taking), but differed crucially in their level of social demand – Conversations (but not Repetitions) involved novel, spontaneous and reciprocal speech that relied on social knowledge.

We had two main objectives. First, we used a data-driven whole-brain approach to evaluate changes in between-region correlations in our two groups (Autism vs Control) and tasks (Conversation vs Repetition). Then we compared group differences in inter-region correlations at task with a larger sample of resting state data, to identify commonalities and differences between the two states.

## **Materials and Methods**

### **Participants**

Nineteen (19) males (aged 14.7 - 28.2 years) with autism and 20 male control participants (aged 15.1 to 32.0 years) took part in the tasks. Participants with autism were recruited from the Washington, DC, metropolitan area and met DSM-5 criteria for ASD (APA, 2013) as assessed by an experienced clinician. All participants with autism received the ADOS module 4 (Lord *et al.*, 2000). The scores from participants with autism met cut-off for the 'broad autism spectrum disorders' category according to criteria established by the National Institute of Child Health and Human Development/National Institute on Deafness and Other Communication Disorders Collaborative Programs for Excellence in Autism (Lainhart *et al.*, 2006). Scores on the Social Responsiveness Scale (Constantino *et al.*, 2003), a measure of social symptom severity, were

obtained by parent-report. The distributions for full-scale IQ, verbal IQ, and age did not differ significantly between the autism and control groups (Supplementary Table 1).

## **Procedure**

Each session consisted of five functional MRI runs. Runs 1, 3 and 5 were Conversations and runs 2 and 4 were Repetition. Prior to scanning, participants were told that they would engage in unstructured and informal conversations with the experimenter. Using a modified version of the Interest Scale questionnaire (Anthony *et al.*, 2013; Bodfish, 2003), participants rated their level of interest in various topics such as "music", "games", and "transportation vehicles", and indicated their top three interests, from which the experimenter selected two. The topic of the final conversation was always work or school life, depending on participant age. The topics of conversations were coded to match the categories on the Interests Scale and are listed in Supplementary Table 2. Participants chose the two nursery rhymes they would recite from a list they received before the session.

Before each run, the experimenter sat in front of a blue screen facing a camera. The run began with 16 seconds of rest (8 TRs), during which the participant saw the word "REST". Then, live video and audio from the experimenter were presented to the subject and the verbal interaction began (see Supplemental Methods). The experimenter always initiated the interaction. Conversations proceeded for 6 minutes, and Repetitions for 3 minutes. After each interaction, the video faded to black and a "STOP" slide was displayed to the participant, followed by 30 additional seconds (15 TRs) of rest to allow for delayed hemodynamic effects.

## **MRI data acquisition**

T2\*-weighted BOLD images were acquired on a General Electric Signa HDxt 3.0 Tesla scanner (GE Healthcare, Waukesha, WI, USA) with an 8-channel head coil. A single-shot gradient-echo echo planar imaging sequence was used: the acceleration factor of ASSET (Array Spatial Sensitivity Encoding Technique) = 2, TR = 2000 ms, TE (echo time) = 30 ms, flip-angle = 90°, 64×64 matrix, field of view = 227 mm. 40 interleaved sagittal slices with a thickness of 4 mm were used to cover whole brain (voxel size = 3.55 x 3.55 x 4 mm<sup>3</sup>). Sagittal acquisition was used to help minimize slicing artifact that can occur when using more typical axial acquisitions during overt speech (e.g. Birn *et al.*, 2010). The Conversation runs consisted of 203 TRs and the Repetition runs consisted of 113 TRs. A high-resolution T1-weighted anatomical image (MPRAGE, Magnetization-Prepared Rapid Gradient-Echo) was also obtained (124 axial slices, 1.2 mm slice thickness, field of view = 24 cm, 224 x 224 acquisition matrix).

### **MRI data pre-processing**

Echo-planar image preprocessing was performed with AFNI (Cox, 1996). The first four TRs of each run were removed to allow for T1 stabilization, and outlying time points in each voxel, corresponding to motion and other artifacts, were attenuated with AFNI's 3dDespike. Volumes were slice-time corrected and co-registered to the anatomical image. Sources of motion-related and physiological noise were removed with ANATICOR (Jo *et al.*, 2010; 2013) and aCompCorr (Behzadi *et al.*, 2007). The regressors for these methods were created by first segmenting the anatomical scan into tissue types with Freesurfer (Fischl *et al.*, 2002). An eroded ventricle mask was applied to the volume-registered echo-planar image data to create a nuisance time series for the ventricles. An eroded white matter mask was used to create a "localized" estimate of the BOLD signal in white matter, which was averaged within a 20-mm radius sphere centered on



each voxel (see Jo *et al.*, 2010; 2013 for further discussion). For runs with physiological data, 8 Retroicor (Glover *et al.*, 2000) and 5 respiration volume per time (Birn *et al.*, 2008) regressors were created from the cardiac and respiration measures, estimated at slice time 0. The multiple physiological regressors of each type represent several interpolated time points within each TR. Additional speech-related motion and respiration artifacts were modeled using a PCA decomposition of BOLD fluctuations in non-gray-matter locations (Behzadi *et al.*, 2007). Eroded masks of white matter and ventricles were joined into a single nuisance tissue mask and applied to each re-aligned and co-registered functional time series, which were detrended by 4th order polynomials prior to PCA in order to remove scanner drift and other very low frequency signals. The time series were then decomposed with PCA, retaining the first 3 principal components, as pilot analyses indicated these were the components that contained the most variance related to model-based respiration regressors (Retroicor and RVT regressors; see also Stoddard *et al.*, 2016). The full nuisance regression model for each voxel therefore included regressors for the 4th order polynomial baseline model, 1 ventricle time series, 1 localized white-matter time series, 6 motion parameters, 5 respiration volume per time regressors, 8 Retroicor time series (4 cardiac and 4 respiration regressors) and 3 aCompCor principal component regressors. The "clean" residual time series of this model was converted into Talairach space, resampled to  $3\text{mm}^3$  isotropic voxels, and used in all subsequent analyses.

The magnitude of transient head motion was calculated from the 6 motion parameters and aggregated as a single variable using AFNI's @1dDiffMag to calculate a Motion Index (Berman *et al.*, 2016; Gotts *et al.*, 2012). This measure is comparable to average Framewise Displacement over a scan (Power *et al.*, 2012) and is in units of mm/TR. The grand average correlation of all voxel time series with each other, or GCOR (for global correlation level), was also calculated for

each experimental run to serve as a more omnibus measure of residual global artifacts and was used as a nuisance covariate in ROI-based, group-level analyses (Gotts *et al.*, 2017; Gotts, Jo, *et al.*, 2013; Saad *et al.*, 2013; Zachariou *et al.*, 2017).

### **Data-driven functional connectivity analyses**

Our main analyses utilized a functional connectivity approach in which correlations among voxel- and/or ROI-based time series were compared across conditions, using nuisance covariates of age, motion, and GCOR in group-level analyses to control for any differences in residual global artifacts that might exist between autism and control subjects (Gotts *et al.*, 2017; Gotts, Jo, *et al.*, 2013; Saad *et al.*, 2013; Zachariou *et al.*, 2017). In part, this choice was mandated by the lack of appropriately spaced baseline periods during naturalistic conversation, preventing the use of a more typical general linear model approach. This form of analysis was also directly comparable to that applied previously to resting-state data. Our experiment used a 2x2 mixed factorial design with one within-subjects variable (Task) and one between-subjects variable (Group). Two types of relationships were identified: 1) inter-region correlations that differed between the autism and control groups regardless of task (i.e. main effect of Group); and 2) inter-region correlations that differed by Group and Task (their interaction). Our functional connectivity analyses employed the 3 steps used by Gotts and colleagues (see also Berman *et al.*, 2016; Gotts *et al.*, 2012): seed definition, target ROI selection, and region-to-region correlation analysis. We undertook all 3 steps for both the Group effect and the Group by Task interaction effects. For completeness, we also report the main effect of Task (Conversation>Repetition).

Seeds were identified using whole-brain "connectedness" (e.g. Cole *et al.*, 2010; Gotts *et al.*, 2012). The average Pearson correlation of each voxel's time series with every other voxel's time series was calculated to create a 3D reduction of the 4D (3D + Time) dataset for each functional run (available as the AFNI function 3dTcorrMap). Since connectedness reflects the average level of correlation with the rest of the brain, it gives an indication of how involved a given brain area was with the task during the scan. This approach, akin to *centrality* in graph theory, has been used previously in studies of resting-state (Berman *et al.*, 2016; Cole *et al.*, 2010; e.g. Gotts *et al.*, 2012; Meoded *et al.*, 2015; Stoddard *et al.*, 2016; Watsky *et al.*, 2018) and task-based functional connectivity (Song *et al.*, 2015; Steel *et al.*, 2016). Linear mixed effects models (Chen *et al.*, 2013) were constructed whose dependent variables were the voxel-wise connectedness maps from each functional run. Group and Task and their interaction were included as a fixed effects. Participant Age and the Motion Index (computed separately for each run) were included as nuisance covariates. Participant was treated as a random intercept. Cluster correction was used to control the Type I error rate. The average smoothness of the cleaned functional time series was estimated with AFNI's 3dFWHMx, using the empirical, spatial autocorrelation function (June 2016). 3dClustSim (June 2016) was then used to run a Monte Carlo simulation with 5,000 iterations within the gray matter mask in Talairach space that the analyses were performed within. Importantly, the smoothness estimates and noise simulations did not assume Gaussian distributions of activity, which has been shown to inflate the false positive rate in studies using more traditional cluster size correction (Cox *et al.*, 2017; e.g. Eklund *et al.*, 2016). Clusters were selected at a cluster defining threshold of  $p < .001$ , minimum cluster size  $k=22$ .

The seed definition step was then followed with more typical seed-based correlation analyses. Signal within each seed region was averaged across voxels to form ROI-averaged time series, which were correlated with the time series for every voxel in the brain, separately for each run. These correlations were Fisher  $z$ -transformed and used as dependent variables in linear mixed effects models with the same fixed and random effects as the previous step. We tested for the main effect of Group at a voxel threshold of  $p < .001$ , with correction by cluster size for whole-brain comparisons as well as the number of seeds tested (i.e. FWE correction to  $p < [.05 / (\text{number of seeds})]$ ). Results of the separate seed-based tests were combined to form one composite map, first by binarizing each seed-to-whole-brain test into zeros and ones and then summing across them. This map was then thresholded at 80% of the maximum possible sum (i.e. if 6 seeds were tested, included voxels would need to have arisen in 5/6 tests). Clusters smaller than 20 voxels were then excluded in order to eliminate small singleton clusters with higher levels of voxel noise. Secondary target regions were then combined together with seed regions to arrive at a full set of ROIs. Region-by-region matrix analyses were then conducted using the same contrasts applied to connectedness and the seed-based tests, allowing the examination of all inter-regional relationships. For these all-to-all matrix tests, GCOR was included as an additional nuisance covariate (to Age and Motion Index) in order to insure that any group effects were not due to residual global or speech-related artifacts (Gotts *et al.*, 2017; Gotts, Jo, *et al.*, 2013; Saad *et al.*, 2013).

Correlations with symptom severity as measured with the Social Responsiveness Scale (Constantino *et al.*, 2003; Gotts *et al.*, 2012; Ramot *et al.*, 2017) were tested with additional models in the autism subjects, separately for the Group Main Effect ROIs and the Group X Task Interaction ROIs. The analyses of Group Main Effect ROIs included data from both tasks,

Conversation and Repetition, whereas the analysis of Group X Task Interaction ROIs focused on the Conversation runs, which were of primary interest. Covariates for these models included those used in the region-by-region matrix-level analyses (Age, Motion, GCOR).

Multiple comparisons in the region-by-region correlation tests were controlled with False Discovery Rate (e.g. Genovese *et al.*, 2002), calculated by pooling over  $p$ -values resulting from task matrix tests together (autism vs. control for the Group ROIs; Interaction test in Group X Condition ROIs; effects of SRS in both of these matrices). We report all results un-thresholded in the lower triangles of the matrices, with corrected results ( $q < .05$ ) in the upper triangles.

### **Comparison of task and resting state data**

Previous studies of functional connectivity at rest in adolescents and adults with autism have repeatedly established a pattern of cortico-cortical decreases, particularly involving brain regions associated with aspects of social processing (e.g. Anderson *et al.*, 2011; Cheng *et al.*, 2015; Di Martino *et al.*, 2014; Gotts *et al.*, 2012; see Picci *et al.*, 2016 for review). We included an explicit comparison of results in task and rest in the current study to determine which patterns of functional connectivity differences are robust across cognitive states with and without overt motor behaviors versus those that are context-specific to state. The resting state data we included have been used in previous publications (Gotts *et al.*, 2012; 2017; Gotts, Jo, *et al.*, 2013; Gotts, Saad, *et al.*, 2013; Plitt *et al.*, 2015; Power *et al.*, 2017; Ramot *et al.*, 2017) and were collected on the same 3 Tesla MRI scanner as the task data. The preprocessing for these data also used the same ANATICOR procedure as for the task data with the only difference being the lack of the aCompCor regressors (Behzadi *et al.*, 2007). For rest scans, participants were instructed to lie still and relax, maintaining fixation on a central cross on the viewing screen.

Participants included 56 autistic males (mean age = 19.1 years, SD = 3.8 years) and 62 control males (mean age = 21.2 years, SD = 5.1 years), with the same selection/inclusion criteria as discussed above for the task data. Participant groups were matched on age, IQ, head motion, and overall measures of temporal signal to noise ratio. Informed assent and consent were obtained from all participants and/or their parent/guardian (participants younger than 18), and the experiment was approved by the NIMH Institutional Review Board (protocol 10-M-0027, clinical trials number NCT01031407).

Two sets of analyses were conducted with resting state data. In the first, the regions identified as showing a main effect of group during task were applied directly to the resting-state data for quantitative comparison with task using linear mixed effect models (AFNI's 3dLME), with Conversation and Repetition data pooled to form the condition 'Task'. Each region-by-region combination of functional connectivity served as dependent variables, with Group and State (Task, Rest) included as fixed effects. Participant Age, Motion Index (computed separately for each run), and GCOR were included as nuisance covariates, and participant was treated as the random intercept. Main effects of Group were evaluated within Task and Rest separately, along with a Group X State interaction (correction for multiple comparisons by False Discovery Rate to  $q < .05$ ). The inclusion of GCOR as a covariate accounted for residual global artifacts in both Task and Rest datasets, as well as any differences due to the slight differences in preprocessing. The second analysis compared whole-brain connectedness between autism and control participants in Rest, with Age and Motion Index as nuisance covariates for comparison with the main effect of Group during Task in terms of spatial overlap (voxelwise threshold of  $p < .001$ , FWE corrected using cluster size to  $p < .05$ ; at this voxelwise threshold, results were also corrected by False Discovery Rate to  $q < .05$ ).

## Results

### Verbal output

First we examined whether participants in the autism and control groups performed the task similarly, to ensure any group differences in the neuroimaging analysis could not be explained by gross differences in task-relevant behavior. We examined SpeakingTime (defined below), total number of words uttered, number of speaking turns taken, and number of words per sentence.

For each run, SpeakingTime was calculated as the ratio of time a participant spoke during a run divided by the total time spent speaking by both the participant and experimenter [ $\text{PPTspeech} / (\text{PPTspeech} + \text{EXPspeech})$ ]. Ratios greater than 0.5 indicated that the participant talked more than the experimenter. Overall there were no differences between groups or conditions for the Conversation ( $t(37)=0.31$ ,  $p=.76$ ) or Repetition runs ( $t(37)=0.66$ ,  $p=0.51$ , Supplementary Fig. 1). The total number of words produced also did not differ between the autism and control groups ( $t(37) = -1.4$ ,  $p=0.17$ ), and neither did the number of speaking turns ( $t(37) = 0.46$ ,  $p= 0.65$ ), nor the number of words per sentence ( $t(37) = 0.01$ ,  $p = 0.99$ ). For the repetition runs, the participant repeated exactly what their partner spoke, resulting in exactly matched verbal output.

### Motion

Motion Index values for all runs individually (Supplementary Fig. 2) were subjected to a 2x2 repeated measures ANOVA with Group, Task, and Group-by-Task as terms. Motion did not differ by Task ( $F(1,74) = 0.92$ ,  $p=.34$ ), and Task and Group did not interact to predict motion ( $F(1,74) = 0.47$ ,  $p=0.50$ ). However, there was a statistically significant main effect of Group ( $F(1,74) = 9.1$ ,

$p=.003$ ). To assess the overall magnitude of this group difference, we calculated the average Motion Index by subject and by group, and compared them. The ASD group moved 57 microns per TR (about  $1/17^{\text{th}}$  of a millimeter) more than the TD controls (Mean ASD Motion =  $0.216 \pm .09 \text{ mm/TR}$ . Mean TD motion =  $0.159 \pm .07 \text{ mm/TR}$ ). To mitigate any remaining motion-related artifacts that were not already removed by our cleaning procedure, the Motion Index for each run was included as a covariate in all subsequent correlation analyses. A control analysis excluding high motion runs in the Autism group and low motion runs in the Control group in order to match motion levels by group also did not lead to large changes in the results reported below.

### **Comparison of Conversation vs. Repetition in whole-brain connectedness**

Due to the limitations of a general linear model approach during naturalistic conversation without appropriately spaced baseline periods, we instead took a basic correlational (task-driven functional connectivity) approach to the main analyses of interest (although see Supplementary Fig. 3 for a restricted general linear model analysis of local activity differences in Speaking versus Listening periods). Correlation levels among voxels and/or regions of interest were compared across factors in our design, with the further use of nuisance covariates, such as Age, Motion, and GCOR in group-level analyses. Using this approach, we first examined the Main Effect of Task on whole-brain "connectedness" (the correlation of each voxel with the rest of the brain; Cole *et al.*, 2010; Gotts *et al.*, 2012; Salomon *et al.*, 2011). The main effect of Task yielded highly significant results with multiple large clusters (voxelwise threshold of  $p < .001$ ). The strongest differences in connectedness (Conversation > Repetition) were observed in in dorsomedial prefrontal cortex, left fronto-temporal cortex with a peak in left anterior temporal



lobe (prominently including the pole and STG), and left angular gyrus (Supplementary Table 3; Fig. 1).

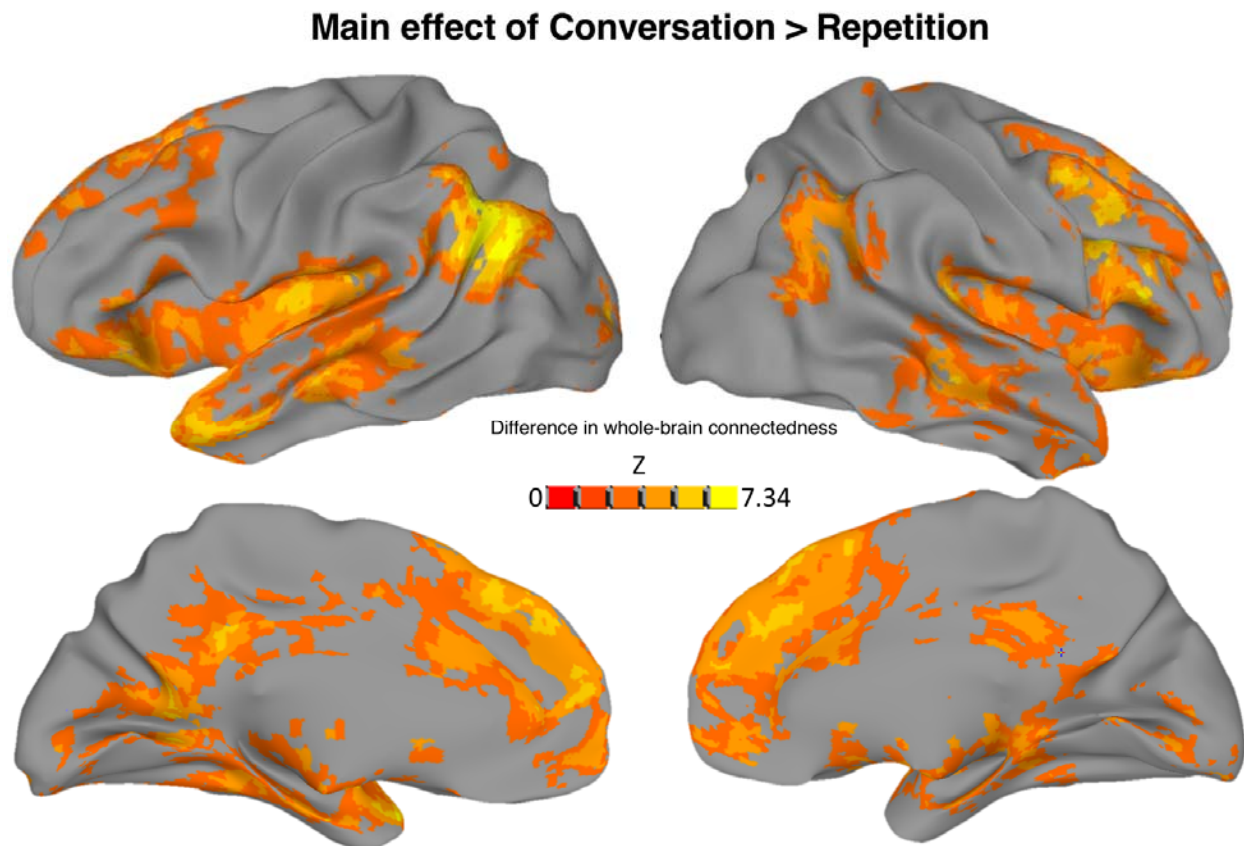

**Figure 1: Main Effect of Conversation > Repetition**

### **Main effect of Group**

The main effect of Group on connectedness values identified 6 regions whose whole-brain connectedness was greater in the autism than the control group. There were no regions showing greater correlation for the control than the autism group. Increased correlation for the autism participants was found for two clusters in right anterior temporal lobe, a cluster at the left temporal pole, the right inferior frontal gyrus and anterior insula, right ventral striatum, and somatomotor cortex (Supplementary Table 4). Using these clusters as seeds in a seed-to-whole-

brain analyses (see Methods), we identified 10 additional regions that showed greater correlation in autism than control participants (Fig. 2; Supplementary Table 5). An analysis of the correlation values within the region-by-region matrix revealed a number of regional pairs whose correlations differed between the autism and control groups. This was most pronounced among right hemisphere regions such as the precuneus, anterior superior temporal gyrus and sulcus, and IFG. The most implicated region was a cluster in the right ventral striatum, which showed a significant hyper-correlation with each of the other regions, even after multiple comparisons correction (Fig. 2).

We also identified region pairs whose correlation was predicted by autism symptom severity (indexed by the Social Responsiveness Scale). The most strongly implicated areas were in lingual gyrus bilaterally, the middle cingulate, precuneus, and right inferior frontal gyrus (see yellow squares in Fig. 2B). All results except one were positive correlations, with one region pair showing a negative correlation (higher score  $\rightarrow$  lower functional connectivity levels between the left cerebellum and the left fusiform/middle temporal gyrus). Three of these autistic symptom effects overlapped with the group effects: that is, there were three region pairs whose correlations were both elevated in autism relative to controls, and also greater in autism participants with more severe social symptoms. These were the right IFG with right parahippocampal gyrus, right parahippocampal gyrus with right precuneus, and right precuneus with bilateral middle cingulate cortex.

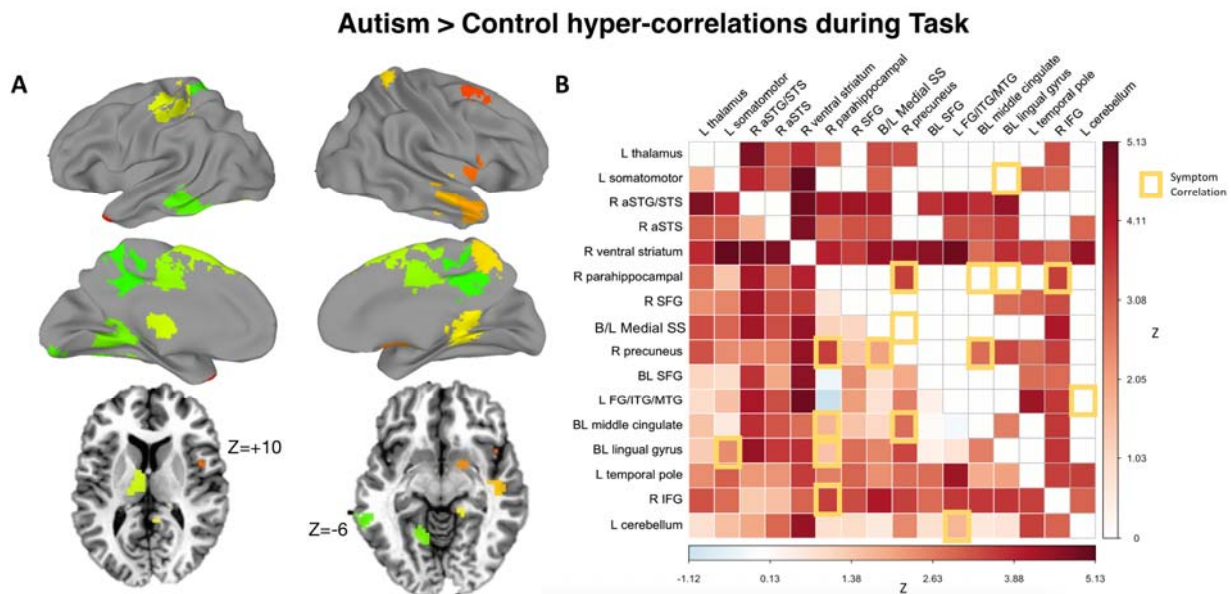

**Figure 2: Autism > Control hyper-correlations during Task**

### Group by Task interactions

One region – in the right lateral fusiform gyrus -- showed a difference in whole-brain connectedness by Group and Task ( $p < .0001$ , FWE corrected to  $p < .05$ ). Using this region as a seed revealed 14 additional regions whose correlations with the seed varied by group and task (Fig. 3; Supplementary Table 6). These additional regions were then aggregated with the right fusiform seed into one set of regions (15 total), and their correlations were analyzed with respect to one another (which had not yet been explicitly tested). In addition to the previously determined relationships between the right fusiform seed and the other 14 regions, three more region pairs that did not include the seed also showed correlations that varied by group and task: left posterior STS with left middle temporal temporal cortex, left middle temporal cortex with right posterior STS, and calcarine gyrus with the right precentral gyrus. For illustration of the nature of these interaction effects, mean Fisher-z transformed correlation coefficients for each

participant are plotted in Fig. 3C. Overall, autism participants showed a greater between-region increase in correlation during Conversation compared to Repetition than did controls. We also tested for an effect of symptom severity involving the Group-by-Task dependent regions. Only one pair survived False Discovery Rate correction: functional connectivity between right extrastriate and left posterior STS showed a positive correlation with social symptoms (Supplementary Fig. 4).

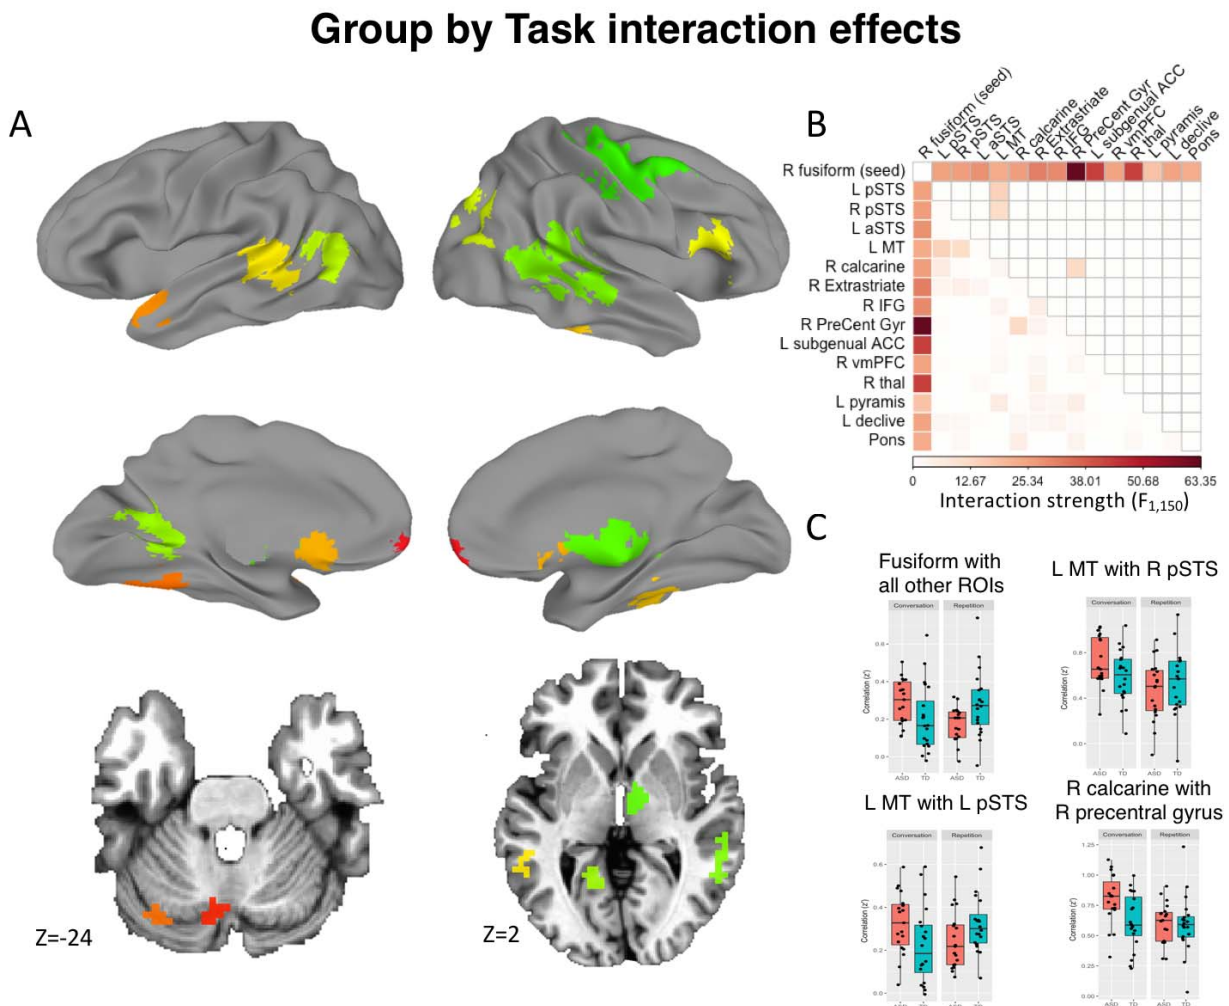

**Figure 3: Group by Task interaction effects.**

## Comparison of results during Task and Rest

Both the main effect of Group and the interaction of Group and Task condition (Conversation vs. Repetition) indicated that task-based functional connectivity in autism was greater than in controls (i.e. hyper-correlation). This pattern departs qualitatively from the decreases in resting-state functional connectivity among social brain regions observed by our lab and others over the same age ranges (Picci *et al.*, 2016). To examine this apparent discrepancy, we therefore compared the patterns of task-based and resting-state functional connectivity using the regions showing a main effect of Group in the current study. The resting-state data have been used in a variety of studies published previously by our lab (Gotts *et al.*, 2012; 2017; Gotts, Jo, *et al.*, 2013; Gotts, Saad, *et al.*, 2013; Plitt *et al.*, 2015; Power *et al.*, 2017; Ramot *et al.*, 2017), with groups matched on age, IQ, head motion, and measures of temporal signal to noise ratio. Region-by-region results are shown in Fig. 4, separately for Task (pooling Conversation and Repetition) and Rest. As already shown above, increases in task-based functional connectivity are observed in autism for these regions (Fig. 4A). Interestingly, increases are also observed during rest, particularly involving the left thalamus (with virtually all of the other regions) and right ventral striatum (with right parahippocampal gyrus, right superior frontal gyrus, and bilateral medial somatosensory cortex), consistent with previous reports by Di Martino *et al.* (2011) and Cheng *et al.* (2015). These common effects are highlighted as state-invariant, or "core", region pairs using green squares in Fig. 4C. A number of region pairs also differ significantly by group and state (i.e. Group X State interaction; black squares in Fig. 4C), with many pairs showing increases during Task and lacking significant differences in Rest, and one region pair (left somatomotor with right anterior STS) showing a significant decrease in Rest and lacking differences in Task.

Given the relative lack of differences seen in the Rest data when using the regions detected during Task - particularly the well-known cortico-cortical decreases, we also compared whole-brain connectedness between autism and control at Rest. The results during Rest are shown in Fig. 5 in blue, with the regions showing a main effect of Group during Task shown in red for comparison (voxelwise threshold of  $p < .001$  for both Task and Rest, corrected to  $p < .05$  by cluster size). The decreases in resting-state functional connectivity in autism are indeed quite prominent, but they overlap very little with the regions showing increases during Task, explaining the lack of decreased functional connectivity seen in Fig. 4B. Despite these state-related differences, the prominent state-invariant results involving the thalamus and ventral striatum (shown in green in Figs. 4C and 5) highlight notable mechanistic commonalities between Task and Rest.

## Group differences in correlation by State

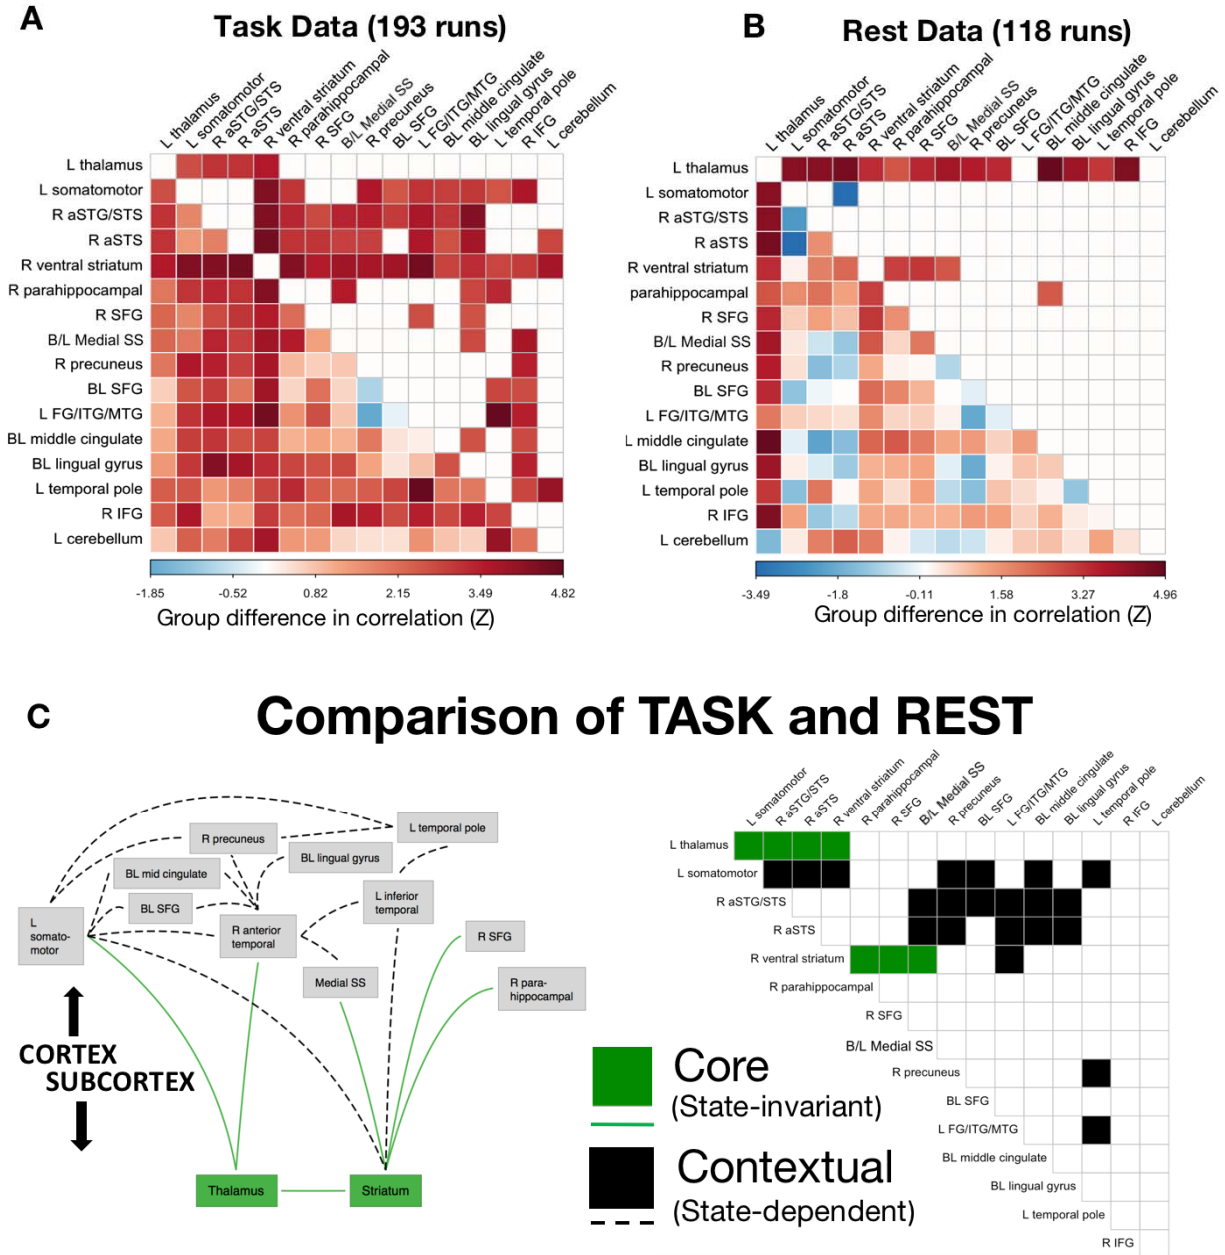

Figure 4: Comparisons of Task and Rest

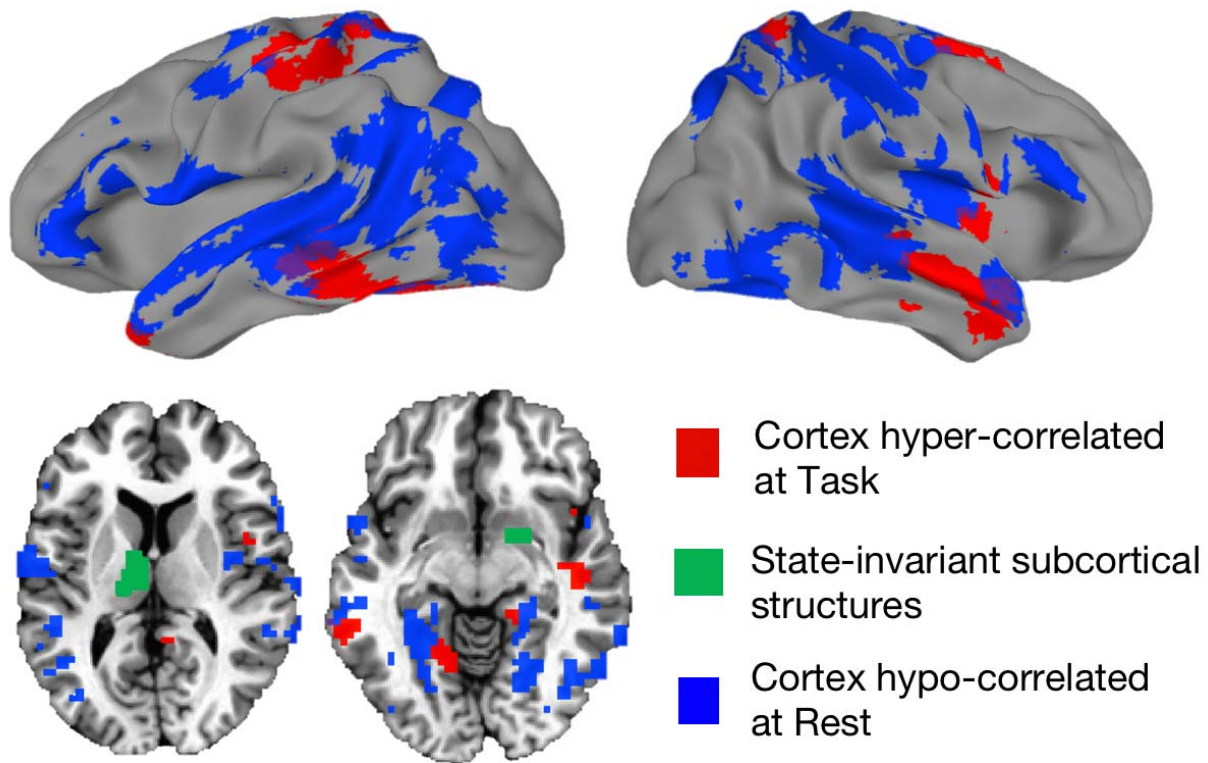

**Figure 5: Regions showing the greatest hyper-correlation at Task, and the greatest hypo-correlation at Rest.**

## Discussion

The purpose of this study was to characterize neural activity during spontaneous conversation in autism. Participants engaged in face-to-face spoken interactions while being scanned with fMRI. Our design used two groups (people with autism vs. controls) who performed two tasks (Conversation vs. Repetition). Comparing neural activity during the tasks (across groups), greater whole-brain correlation was observed during Conversation than Repetition in regions involved with communication and social processing. Comparing the groups (across tasks), greater task-driven functional connectivity was observed for the autism than the control group,



mainly between regions involved with communication and sensorimotor processing. Furthermore, functional connectivity among many region pairs, especially those involving right parahippocampal gyrus, right precuneus, right IFG and bilateral middle cingulate, was strongest in subjects with more severe social symptoms observed outside of the laboratory. Next we examined neural activity differences between groups as a function of task. We found that, particularly among visual and social areas and under high social demand, functional connectivity in the autistic (but not control) participants increased, and increases were related to more severe social symptoms. Finally, we examined the relationship between group differences in task-driven functional connectivity and group differences in previously published resting-state connectivity of autism and control participants that instead exhibited a pronounced decrease in cortico-cortical correlations in autism. We found that some region pairs that were hyper-correlated for autism in Task were also hyper-correlated at Rest, and that all such pairs involved the thalamus and striatum. By contrast, many more widespread regions showed strong context-specific effects (i.e. Group by State interactions), with regions hyper-correlated during Task failing to show differences in Rest and regions hypo-correlated during Rest failing to show differences in Task (Fig. 4 and 5).

### **Increased functional connectivity in autism**

We observed widespread increased functional connectivity in autism at Task. These increases were not easily explainable by head motion or other residual global artifacts because measures of these artifacts were covaried in all analyses. This is consistent with at least one other study of functional connectivity during language processing that showed increased occipital recruitment

in autism during category judgments of visually-presented nouns (Feelings vs Tools and Colors; (Shen *et al.*, 2012). It also accords with activation studies showing autistic children recruit more areas than control children when judging emotion and irony in prosody (Colich *et al.*, 2012; Eigsti *et al.*, 2012; Wang *et al.*, 2006), or incorporating real-world knowledge in sentence processing (Groen *et al.*, 2010; Tesink *et al.*, 2009). However, other studies of functional connectivity during language processing that required making judgments about imagery (Kana, 2006) or answering questions about agent-patient relationships in visually-presented sentences (Just *et al.*, 2004) have only shown decreased functional connectivity. It may be that tasks with greater sensory demands (e.g. those involving speech vs. mere reading), tasks with social components (e.g. about emotions, sarcastic/ironic prosody, and pragmatics)\_or tasks requiring sustained attention are more likely to elicit hyper-correlation among cortical areas in people with autism. Moreover, not all of these studies have compared groups with matched behavioral (as in the present study).

### **Increased correlation during task versus decreases during rest**

For adolescent participants with autism, the most typical functional connectivity finding in functional MRI resting-state data is that correlations between brain regions involved in social processing are decreased relative to control participants (see Picci *et al.*, 2016 for review). These decreases are furthermore associated with impairments of social functioning in autistic participants as measured by the Social Responsiveness Scale, which establishes that the functional connectivity decreases are relevant to behavior (Di Martino, Shehzad, *et al.*, 2009; Gotts *et al.*, 2012; Ramot *et al.*, 2017). However, in our current study, correlated inter-regional activity was increased in autism, and these increases were also associated with impairments of

social functioning using the same behavioral measure. When we analyzed our previously published resting-state data using the same regions of interest, we found that rather than highlighting a discrepancy between the two datasets in terms of increased versus decreased correlations, a common set of inter-regional relationships held across both sets. All common relationships involved the thalamus and striatum, which were hyper-correlated in autism with each other and with cortical areas. The left thalamus and caudate nucleus exhibited greater correlation with the left somatomotor cortex, the right anterior STS, and the right ventral striatum in autistic participants. The right ventral striatum further exhibited greater correlation in autism with the bilateral medial somatosensory cortex, the right parahippocampal gyrus, and the right superior frontal gyrus. Taken together, the current findings highlight two classes of relationships among regions — “core” state-invariant relations and “contextual” state-dependent relations.

### **Context-specificity of cortico-cortical correlations**

As discussed, many results were state-dependent – regions that were hypercorrelated during task appeared to function at typical levels or were even hypo-correlated during rest. Furthermore, in our task data, participants with more severe autistic symptoms showed the greatest inter-regional functional connectivity. Interestingly, an inverse relationship between functional connectivity and symptoms (using the same measure) was found in resting state data, as reported in Gotts et al. (2012) and Ramot et al., (2017). There, participants with more severe autism symptoms showed more strongly *decreased* inter-regional correlation. How can this apparent discrepancy be explained? One possibility is that the increased functional connectivity at task is a compensatory neural strategy (c.f. Shen *et al.*, 2012). On this account, more severely autistic participants would require greater inter-regional correlation to perform social tasks similarly to controls. This

compensatory neural strategy could be deployed in social situations outside the laboratory, too. Indeed, our autistic participants had normal or high IQs and language ability, and their lives seemed in most ways similar to those of controls. Like the control participants, the participants with autism talked (during the experiment) about attending schools, holding jobs, and interacting with peers. In such situations, many simple conversations are likely to occur, most of which are likely to be “successful” in the sense that conversational goals – requesting or providing information, assistance, praise, guidance and so on – are accomplished. Why, then, did our autistic participants receive diagnoses if they are able to compensate and function at nearly normal levels? Even a highly successful neural strategy could result in slight but detectable behavior differences – i.e., the compensation is not perfect, but it is “good enough” to allow some people with milder autism to function (and to make autism diagnosis a non-trivial procedure requiring hours of observation by trained professionals (Lord *et al.*, 2000)). Whether compensatory hyper-correlation observed in this study would generalize to participants with more severe forms of autism is a question that future studies should address.

Notably, the areas that were most severely hypo-correlated at Rest and are negatively correlated with symptoms (Fig. 5, blue areas) do not overlap well with the areas that show the highest degree of hyper-correlation during Task (Fig. 5, red areas). This, too, may be consistent with a compensation account. If connectivity among some social brain areas is intrinsically disordered in autism (i.e. Fig. 5 blue areas), perhaps the compensation for these disordered connections takes place via other, spatially non-identical cortical areas (red areas), bringing regions that are hypo-correlated at Rest up to control levels. Novel, compensatory routing among cortical areas may take place via the thalamus, discussed below. Critically, these effects did not appear to manifest in the local activity levels as indexed by a general linear model analysis

(Supplementary Materials, Supplementary Fig. 3), helping to establish that these effects are more selective to inter-regional interactions rather than simple activity levels in those regions.

### **Core features: abnormal thalamic and striatal interactions – a gating issue?**

The thalamus and basal ganglia (within which the striatum resides) are strongly anatomically interconnected with each other and with the entire cerebral cortex. Through these connections, both structures gate transmission between distal cortical regions (McNab and Klingberg, 2008; Sherman, 2007). Could abnormal gating explain the abnormal cortical interactions? In our study the gates were ‘wide open’, especially the intrinsic connections measured during resting state: of the 14 task-defined cortical regions, 12 were intrinsically hyperconnected with the thalamus during rest, even after statistical correction (Fig. 4B). The fact that these regions were defined independently of the rest data is striking and suggests that intrinsic thalamocortical connectivity could partially determine which areas of cortex are likely to exhibit hyper-correlations during sustained or social tasks.

In an early study, Mizuno et al. (2006) observed increased thalamocortical correlation during a non-social visuomotor task (N=8) and suggested that it may be ‘hyperfunctional’, helping to compensate for decreased cortico-cortical connectivity (Mizuno *et al.*, 2006). This is unlikely (and distinct from our current proposal), given that increased thalamocortical correlation is also observed at rest (Cerliani *et al.*, 2015; Di Martino *et al.*, 2011; 2014; Nair *et al.*, 2014). Instead, we propose that the context-dependent increases may play this compensatory role. One previous study has examined correlation of brain activity in both task and rest states in autism, but exclusively focused on cortical results. You et al. (2013) found that overall distal connectivity

was heightened in autism during a non-social sustained attention task, but decreased at rest (You *et al.*, 2013). Furthermore, they reported that inattention problems in everyday life were associated with a greater increase in functional connectivity from rest to task in autism, from which they conclude that the increased task-driven functional connectivity is maladaptive. However, it is difficult to distinguish maladaptive from compensatory hyper-correlation in the You *et al.* study as the autism and control groups were not matched for behavioral performance on the in-scanner task.

To our knowledge this study is the first to characterize brain activity in autism during the context most similar to the gold standard of autism diagnosis (Lord *et al.*, 2000)—face-to-face spoken interactions. It also emphasizes the importance of characterizing autistic brain organization in diverse task contexts and cognitive states. Further research should seek a more mechanistic understanding of whether subcortico-cortical connections may play a causal role in abnormal state-dependent cortico-cortical connections, and how disordered neural connections may be changed via interventions (Ramot *et al.*, 2017).

## **Acknowledgments**

We thank Bako Orionzi, Ian Eisenberg and Cynthia Peng for their assistance and our participants and their families for their participation.

## **Funding**

This study was supported by the Intramural Research Program of the National Institute of Mental Health, National Institutes of Health, NIH Clinical Study Protocol 10-M-0027, Grant no.: ZIA

MH002920-09, Clinical trials ID: NCT01031407, the NIMH-UCL Joint Doctoral Training Program in Neuroscience, and a Leverhulme Trust Early Career Fellowship to KJ.

## References

Abrams DA, Lynch CJ, Cheng KM, Phillips J, Supekar K, Ryali S, et al. Underconnectivity between voice-selective cortex and reward circuitry in children with autism. *Proc Natl Acad Sci USA* 2013; 110: 12060–12065.

Agnew ZK, McGettigan C, Banks B, Scott SK. Articulatory movements modulate auditory responses to speech. *NeuroImage* 2013; 73: 191–199.

Anderson JS, Nielsen JA, Froehlich AL, DuBray MB, Druzgal TJ, Cariello AN, et al. Functional connectivity magnetic resonance imaging classification of autism. *Brain* 2011; 134: 3742–3754.

Anthony LG, Kenworthy L, Yerys BE, Jankowski KF, James JD, Harms MB, et al. Interests in high-functioning autism are more intense, interfering, and idiosyncratic than those in neurotypical development. *Development and Psychopathology* 2013; 25: 643–652.

Attwood A, Frith U, Hermelin B. The understanding and use of interpersonal gestures by autistic and Down's syndrome children. *J Autism Dev Disord* 1988; 18: 241–257.

Baron-Cohen S. Social and pragmatic deficits in autism: Cognitive or affective? *J Autism Dev Disord* 1988; 18: 379–402.

Behzadi Y, Restom K, Liao J, Liu TT. A component based noise correction method (CompCor) for BOLD and perfusion based fMRI. *NeuroImage* 2007; 37: 90–101.

Berman RA, Gotts SJ, McAdams HM, Greenstein D, Lalonde F, Clasen L, et al. Disrupted sensorimotor and social–cognitive networks underlie symptoms in childhood-onset schizophrenia. *Brain* 2016; 139: 276–291.

Birn RM, Kenworthy L, Case L, Caravella R, Jones TB, Bandettini PA, et al. Neural systems supporting lexical search guided by letter and semantic category cues: A self-paced overt response fMRI study of verbal fluency. *NeuroImage* 2010; 49: 1099–1107.

Birn RM, Smith MA, Jones TB, Bandettini PA. The respiration response function: The temporal dynamics of fMRI signal fluctuations related to changes in respiration. *NeuroImage* 2008; 40: 644–654.

Blank SC, Scott SK, Murphy K, Warburton E, Wise RJS. Speech production: Wernicke, Broca and beyond. *Brain* 2002; 125: 1829–1838.

Bodfish JW. The interests scale. 2003

Cerliani L, Mennes M, Thomas RM, Di Martino A, Thioux M, Keyzers C. Increased Functional Connectivity Between Subcortical and Cortical Resting-State Networks in Autism Spectrum Disorder. *JAMA Psychiatry* 2015; 72: 767–11.

Chen G, Saad ZS, Britton JC, Pine DS, Cox RW. Linear mixed-effects modeling approach to fMRI group analysis. *NeuroImage* 2013; 73: 176–190.

Cheng W, Rolls ET, Gu H, Zhang J, Feng J. Autism: reduced connectivity between cortical areas involved in face expression, theory of mind, and the sense of self. *Brain* 2015; 138: 1382–1393.

Cole MW, Pathak S, Schneider W. Identifying the brain's most globally connected regions. *NeuroImage* 2010; 49: 3132–3148.

Colich NL, Wang A-T, Rudie JD, Hernandez LM, Bookheimer SY, Dapretto M. Atypical Neural Processing of Ironic and Sincere Remarks in Children and Adolescents with Autism Spectrum Disorders. *Metaphor and Symbol* 2012; 27: 70–92.

Constantino JN, Davis SA, Todd RD, Schindler MK, Gross MM, Brophy SL, et al. Validation of a Brief Quantitative Measure of Autistic Traits: Comparison of the Social Responsiveness Scale with the Autism Diagnostic Interview-Revised. *J Autism Dev Disord* 2003; 33: 427–433.

Cox RW, Chen G, Glen DR, Reynolds RC, Taylor PA. fMRI clustering and false-positive rates. *Proc Natl Acad Sci USA* 2017; 114: 201614961–E3371.

Cox RW. AFNI: Software for Analysis and Visualization of Functional Magnetic Resonance Neuroimages. *Computers and Biomedical Research* 1996; 29: 162–173.

de Marchena A, Eigsti I-M. Conversational gestures in autism spectrum disorders: Asynchrony but not decreased frequency. *Autism Research* 2010; 3: 311–322.

Denckla MB. Revised neurological examination and subtle signs. *Psychopharmacol Bull* 1985; 21: 773–779.

Di Martino A, Kelly C, Grzadzinski R, Zuo XN, Mennes M, Mairena MA, et al. Aberrant Striatal Functional Connectivity in Children with Autism. *BPS* 2011; 69: 847–856.

Di Martino A, Ross K, Uddin LQ, Sklar AB, Castellanos FX, Milham MP. Functional Brain Correlates of Social and Nonsocial Processes in Autism Spectrum Disorders: An Activation Likelihood Estimation Meta-Analysis. *BPS* 2009; 65: 63–74.

Di Martino A, Shehzad Z, Kelly C, Roy AK, Gee DG, Uddin LQ, et al. Relationship Between Cingulo-Insular Functional Connectivity and Autistic Traits in Neurotypical Adults. *American Journal of Psychiatry* 2009; 166: 891–899.

Di Martino A, Yan CG, Li Q, Denio E, Castellanos FX, Alaerts K, et al. The autism brain imaging data exchange: towards a large-scale evaluation of the intrinsic brain architecture in autism. *Molecular Psychiatry* 2013 19:6 2014; 19: 659–667.



Eigsti I-M, Schuh J, Mencl E, Schultz RT, Paul R. The neural underpinnings of prosody in autism. *Child Neuropsychology* 2012; 18: 600–617.

Eklund A, Nichols TE, Knutsson H. Cluster failure: Why fMRI inferences for spatial extent have inflated false-positive rates. *Proc Natl Acad Sci USA* 2016; 113: 7900–7905.

Fischl B, Salat DH, Busa E, Albert M, Neuron MD, 2002. Whole brain segmentation: automated labeling of neuroanatomical structures in the human brain. Elsevier

2002; 33: 341–355.

Frith CD, Frith U. Interacting Minds--A Biological Basis. *Science* 1999; 286: 1692–1695.

Ghuman AS, van den Honert RN, Huppert TJ, Wallace GL, Martin A. Aberrant Oscillatory Synchrony Is Biased Toward Specific Frequencies and Processing Domains in the Autistic Brain. *Biological Psychiatry: Cognitive Neuroscience and Neuroimaging* 2017; 2: 245–252.

Glover GH, Li TQ, Ress D. Image-based method for retrospective correction of physiological motion effects in fMRI: RETROICOR. *Magnetic Resonance in Medicine* 2000; 44: 162–167.

Gotts SJ, Gilmore AW, Martin A. Brain networks, dimensionality, and global signal averaging in resting-state fMRI: Hierarchical network structure results in low-dimensional spatiotemporal dynamics. *bioRxiv* 2017: 229567.

Gotts SJ, Jo HJ, Wallace GL, Saad ZS, Cox RW, Martin A. Two distinct forms of functional lateralization in the human brain. *Proc Natl Acad Sci USA* 2013; 110: E3435–E3444.

Gotts SJ, Saad ZS, Jo HJ, Wallace GL, Cox RW, Martin A. The perils of global signal regression for group comparisons: a case study of Autism Spectrum Disorders. *Front. Hum. Neurosci.* 2013; 7

Gotts SJ, Simmons WK, Milbury LA, Wallace GL, Cox RW, Martin A. Fractionation of social brain circuits in autism spectrum disorders. *Brain* 2012; 135: 2711–2725.

Groen WB, Tesink C, Petersson KM, van Berkum J, van der Gaag RJ, Hagoort P, et al. Semantic, Factual, and Social Language Comprehension in Adolescents with Autism: An FMRI Study. *Cerebral Cortex* 2010; 20: 1937–1945.

Hagen von dem EAH, Stoyanova RS, Baron-Cohen S, Calder AJ. Reduced functional connectivity within and between ‘social’ resting state networks in autism spectrum conditions. *Social Cognitive and Affective Neuroscience* 2013; 8: 694–701.

Hahamy A, Behrmann M, Malach R. The idiosyncratic brain: distortion of spontaneous connectivity patterns in autism spectrum disorder. *Nature Publishing Group* 2015; 18: 302–309.

Jasmin KM, McGettigan C, Agnew ZK, Lavan N, Josephs O, Cummins F, et al. Cohesion and Joint Speech: Right Hemisphere Contributions to Synchronized Vocal Production. *Journal of Neuroscience* 2016; 36: 4669–4680.

Jo HJ, Gotts SJ, Reynolds RC, Bandettini PA, Martin A, Cox RW, et al. Effective Preprocessing Procedures Virtually Eliminate Distance-Dependent Motion Artifacts in Resting State FMRI. *Journal of Applied Mathematics* 2013; 2013: 1–9.

Jo HJ, Saad ZS, Simmons WK, Milbury LA, Cox RW. Mapping sources of correlation in resting state FMRI, with artifact detection and removal. *NeuroImage* 2010; 52: 571–582.

Just MA, Cherkassky VL, Minshew N. Cortical activation and synchronization during sentence comprehension in high-functioning autism: evidence of underconnectivity. *Brain* 2004; 127: 1811–1821.

Kana RK. Sentence comprehension in autism: thinking in pictures with decreased functional connectivity. *Brain* 2006; 129: 2484–2493.

Lainhart JE, Bigler ED, Bocian M, Coon H, Dinh E, Dawson G, et al. Head circumference and height in autism: A study by the collaborative program of excellence in autism. *American Journal of Medical Genetics Part A* 2006; 140A: 2257–2274.

Lord C, Risi S, Lambrecht L, Cook EH, Leventhal BL, DiLavore PC, et al. The Autism Diagnostic Observation Schedule—Generic: A Standard Measure of Social and Communication Deficits Associated with the Spectrum of Autism. *J Autism Dev Disord* 2000; 30: 205–223.

Loukusa S, Moilanen I. Pragmatic inference abilities in individuals with Asperger syndrome or high-functioning autism. A review. *Research in Autism Spectrum Disorders* 2009; 3: 890–904.

Loveland KA, Landry SH. Joint attention and language in autism and developmental language delay. *J Autism Dev Disord* 1986; 16: 335–349.

McNab F, Klingberg T. Prefrontal cortex and basal ganglia control access to working memory. *Nature Publishing Group* 2008; 11: 103–107.

Meoded A, Morrissette AE, Katipally R, Schanz O, Gotts SJ, Floeter MK. Cerebro-cerebellar connectivity is increased in primary lateral sclerosis. *NeuroImage: Clinical* 2015; 7: 288–296.

Mizuno A, Villalobos ME, Davies MM, Dahl BC, Müller R-A. Partially enhanced thalamocortical functional connectivity in autism. *Brain Research* 2006; 1104: 160–174.

Mundy P, Sigman M, Kasari C. A longitudinal study of joint attention and language development in autistic children. *J Autism Dev Disord* 1990; 20: 115–128.

Müller R-A. Anatomical and Functional Connectivity in Autism Spectrum Disorders. In: *Comprehensive Guide to Autism*. New York, NY: Springer New York; 2014. p. 49–75.

Nair A, Keown CL, Datko M, Shih P, Keehn B, Müller R-A. Impact of methodological variables on functional connectivity findings in autism spectrum disorders. *Hum. Brain Mapp.* 2014; 35: 4035–4048.

Orsmond GI, Krauss MW, Seltzer MM. Peer Relationships and Social and Recreational Activities Among Adolescents and Adults with Autism. *J Autism Dev Disord* 2004; 34: 245–256.

Paul R, Shriberg LD, McSweeney J, Cicchetti D, Klin A, Volkmar F. Brief Report: Relations between Prosodic Performance and Communication and Socialization Ratings in High Functioning Speakers with Autism Spectrum Disorders. *J Autism Dev Disord* 2005; 35: 861–869.

Pelphrey KA, Morris JP, McCarthy G. Neural basis of eye gaze processing deficits in autism. *Brain* 2005; 128: 1038–1048.

Picci G, Gotts SJ, Scherf KS. A theoretical rut: revisiting and critically evaluating the generalized under/over-connectivity hypothesis of autism. *Dev Sci* 2016; 19: 524–549.

Plitt M, Barnes KA, Wallace GL, Kenworthy L, Martin A. Resting-state functional connectivity predicts longitudinal change in autistic traits and adaptive functioning in autism. *Proc Natl Acad Sci USA* 2015; 112: E6699–E6706.

Power JD, Barnes KA, Snyder AZ, Schlaggar BL, Petersen SE. Spurious but systematic correlations in functional connectivity MRI networks arise from subject motion. *NeuroImage* 2012; 59: 2142–2154.

Power JD, Plitt M, Laumann TO, Martin A. Sources and implications of whole-brain fMRI signals in humans. *NeuroImage* 2017; 146: 609–625.

Price CJ. A review and synthesis of the first 20 years of PET and fMRI studies of heard speech, spoken language and reading. *NeuroImage* 2012; 62: 816–847.

Ramot M, Kimmich S, Gonzalez-Castillo J, Roopchansingh V, Popal H, White E, et al. Direct modulation of aberrant brain network connectivity through real-time NeuroFeedback. *eLife* 2017; 6: 693.

Saad ZS, Reynolds RC, Jo HJ, Gotts SJ, Chen G, Martin A, et al. Correcting Brain-Wide Correlation Differences in Resting-State FMRI. <http://www.liebertpub.com/brain> 2013; 3: 339–352.

Salomon R, Bleich-Cohen M, Hahamy-Dubossarsky A, Dinstien I, Weizman R, Poyurovsky M, et al. Global Functional Connectivity Deficits in Schizophrenia Depend on Behavioral State. *Journal of Neuroscience* 2011; 31: 12972–12981.

Scott SK, Blank CC, Rosen S, Wise RJS. Identification of a pathway for intelligible speech in the left temporal lobe. *Brain* 2000; 123: 2400–2406.

Shen MD, Shih P, Öttl B, Keehn B, Leyden KM, Gaffrey MS, et al. Atypical lexicosemantic function of extrastriate cortex in autism spectrum disorder: Evidence from functional and effective connectivity. *NeuroImage* 2012; 62: 1780–1791.

Sherman SM. The thalamus is more than just a relay. *Current Opinion in Neurobiology* 2007; 17: 417–422.

Shriberg LD, Paul R, McSweeney JL, Klin A, Cohen DJ, Volkmar FR. Speech and Prosody Characteristics of Adolescents and Adults With High-Functioning Autism and Asperger Syndrome. *J Speech Lang Hear Res* 2001; 44: 1097–1115.

Song S, Gotts SJ, Dayan E, Cohen LG. Practice Structure Improves Unconscious Transitional Memories by Increasing Synchrony in a Premotor Network. *Journal of Cognitive Neuroscience* 2015; 27: 1503–1512.

Steel A, Song S, Bageac D, Knutson KM, Keisler A, Saad ZS, et al. Shifts in connectivity during procedural learning after motor cortex stimulation: A combined transcranial magnetic stimulation/functional magnetic resonance imaging study. *CORTEX* 2016; 74: 134–148.

Stoddard J, Gotts SJ, Brotman MA, Lever S, Hsu D, Zarate C, et al. Aberrant intrinsic functional connectivity within and between corticostriatal and temporal–parietal networks in adults and youth with bipolar disorder. *Psychological Medicine* 2016; 46: 1509–1522.

Tesink CMJY, Buitelaar JK, Petersson KM, van der Gaag RJ, Kan CC, Tendolkar I, et al. Neural correlates of pragmatic language comprehension in autism spectrum disorders. *Brain* 2009; 132: 1941–1952.

Turken AU, Dronkers NF. The neural architecture of the language comprehension network: converging evidence from lesion and connectivity analyses. *Front Syst Neurosci.* 2011; 5 .... 2011.

Wang AT, Lee SS, Sigman M, Dapretto M. Neural basis of irony comprehension in children with autism: the role of prosody and context. *Brain* 2006; 129: 932–943.

Watsky RE, Gotts SJ, Berman RA, McAdams HM, Zhou X, Greenstein D, et al. Attenuated resting-state functional connectivity in patients with childhood- and adult-onset schizophrenia. *Schizophrenia Research* 2018

Wise R, Greene J, Büchel C, Scott SK. Brain regions involved in articulation. *The Lancet* 1999; 353: 1057–1061.

You X, Norr M, Murphy E, Kuschner E, Bal E, Gaillard W, et al. Atypical modulation of distant functional connectivity by cognitive state in children with Autism Spectrum Disorders. *Front. Hum. Neurosci.* 2013; 7

Zachariou V, Nikas CV, Safiullah ZN, Gotts SJ, Ungerleider LG. Spatial Mechanisms within the Dorsal Visual Pathway Contribute to the Configural Processing of Faces. *Cerebral Cortex* 2017; 27: 4124–4138.

## Figure Captions

**Figure 1: Conversation vs Repetition.** A test for the Main effect of Task, across all whole-brain connectedness values from both groups, revealed a number of areas that showed greater whole-brain involvement during Conversation compared with the Repetition condition. The strongest of these results were frontal and temporal areas (especially left temporal pole), the left temporoparietal junction, and bilateral dorsomedial prefrontal cortex. Voxels significant at  $p < .001$  are plotted on an inflated Freesurfer standard surface (Fischl *et al.*, 2002).

**Figure 2: Group (Autism > Control) comparison of inter-region correlations across tasks.** **A)** Regions of interest defined by the Main Effect of Group plotted on standard surfaces. Axial slices provided to show thalamus and ventral striatum regions. **B)** Region-by-region matrix indicating strength of effect of autism versus control. A main effect of Group (Autism vs. Control) was tested on region-by-region correlation levels. Overall, autism participants showed increased correlation between regions during the social interaction tasks, relative to controls (lower triangle unthresholded, upper triangle False-Discovery-Rate corrected to  $q < .05$ ). Increased functional connectivity was correlated with more severe autistic symptoms measured by the Social Responsiveness Scale (yellow-outlined squares).

**Figure 3: Group by Task interaction effects.** **A)** Group-by-task dependent regions of interest. **B)** Region-by-region matrix. Colors indicate larger F-statistics for the interaction of Group\*Task. Lower triangle = unthresholded values. Upper triangle indicates correction by False Discovery Rate to  $q < .05$ . **C)** For significant results, the raw functional connectivity values (Fisher-z transformed correlation coefficients) were extracted and plotted by Group and Task for

visualization. Autistic participants showed increased correlation levels during Conversation compared to Repetition. During Conversation, autistic participants showed greater correlation levels between regions than controls.

**Figure 4: Comparisons of Task and Rest. A.** Group differences in region-by-region functional connectivity during task in task-defined regions. Higher values indicate larger Autism>Control differences. **B.** Group differences in region-by-region functional connectivity in resting-state data, measured in the same task-defined regions. **C.** Green squares and lines indicate pairs of regions with Autism>Control differences that replicate across Task and Rest. These “core” effects involved the left thalamus and the right ventral striatum (corrected by False Discovery Rate to  $q < .05$  in both Task and Rest). Black squares and lines indicate “contextual” effects occurring between cortical areas (significant Group by State interaction, corrected by False Discovery Rate to  $q < .05$ ).

**Figure 5: Regions showing the greatest hyper-correlation at Task, and the greatest hypo-correlation at Rest.** Autism>Control cortical Task-defined regions (red) shown along with the strongest Control>Autism effects in resting state data (blue). The left thalamus and right ventral striatum regions from the present study are colored green. These subcortical structures showed the greatest state-invariance – with the same differences in correlation with cortex during both task and rest.
